# Supplementary material for: The Soluble Guanylate Cyclase Stimulator IWP-953 Increases Conventional Outflow Facility in Mouse Eyes
Source: PubMed Central journal article supplement — Invest Ophthalmol Vis Sci. 2016 Mar 21;57(3):1317–26. doi: 10.1167/iovs.15-18958 (PMC4811179; doi:10.1167/iovs.15-18958), 2016-03-21
Supplement: i1552-5783-57-3-1317-s01.pdf [file i1552-5783-57-3-1317-s01.pdf]

## **SUPPLEMENTAL MATERIALS**

### **The Soluble Guanylate Cyclase Stimulator IWP-953 Increases Conventional Outflow Facility in Mouse Eyes**

Pei Ge<sup>1</sup>, Iris D Navarro<sup>2</sup>, Marco M Kessler<sup>1</sup>, Sylvie G Bernier<sup>1</sup>, Nicholas R Perl<sup>3</sup>, Renee Sarno<sup>1</sup>, Jaime Masferrer<sup>1</sup>, Gerhard Hannig<sup>1</sup>, W Daniel Stamer<sup>2</sup>

<sup>1</sup>Ironwood Pharmaceuticals, Cambridge, Massachusetts, United States

<sup>2</sup>Ophthalmology Department, Duke University, Durham, North Carolina, United States

<sup>3</sup>formerly of Ironwood Pharmaceuticals, Cambridge, Massachusetts, United States

**Supplemental Tables: 2**

**Supplemental Table 1**

| IWP-953<br>( $\mu$ M) | Myofibroblast-like TM Cells         |                                     | Endothelial-like TM Cells           |                                     |
|-----------------------|-------------------------------------|-------------------------------------|-------------------------------------|-------------------------------------|
|                       | HTM120<br>cGMP (pmol/mg<br>protein) | HTM123<br>cGMP (pmol/mg<br>protein) | HTM130<br>cGMP (pmol/mg<br>protein) | HTM141<br>cGMP (pmol/mg<br>protein) |
| 0                     | 9 $\pm$ 2                           | 28 $\pm$ 0                          | 17 $\pm$ 3                          | 3 $\pm$ 0                           |
| 0.3                   | 16 $\pm$ 2                          | 91 $\pm$ 36                         | 24 $\pm$ 5                          | 17 $\pm$ 3                          |
| 1                     | 28 $\pm$ 5                          | 112 $\pm$ 11                        | 25 $\pm$ 11                         | 40 $\pm$ 3                          |
| 3                     | 36 $\pm$ 4                          | 83 $\pm$ 27                         | 23 $\pm$ 4                          | 22 $\pm$ 11                         |
| 10                    | 56 $\pm$ 6                          | 79 $\pm$ 42                         | 15 $\pm$ 9                          | 32 $\pm$ 4                          |

Cyclic GMP production in primary cultures of human trabecular meshwork (HTM) cells stimulated by IWP-953. Myofibroblast-like HTM120 and HTM123, and endothelial-like HTM130 and HTM141 cell cultures were seeded at a density of  $1 \times 10^5$  cells/well in 24-well plates and incubated with DMEM containing IBMX (0.5 mM) for 15 minutes at 37°C. HTM cell cultures were then incubated with increasing concentrations of IWP-953 ranging from 0.3  $\mu$ M to 10  $\mu$ M or vehicle (0.5% DMSO) for 15 minutes at 37°C. Following cell lysis, cleared HTM cell supernatants were acetylated and the amount of cGMP was measured using a cGMP enzyme immunoassay. Data are expressed as the mean  $\pm$  SD ( $N = 3$ ).

**Supplemental Table 2**

| IWP-953<br>( $\mu$ M) | Myofibroblast-like TM Cells |                     | Endothelial-like TM Cells |                     |
|-----------------------|-----------------------------|---------------------|---------------------------|---------------------|
|                       | HTM120<br>cGMP (nM)         | HTM123<br>cGMP (nM) | HTM130<br>cGMP (nM)       | HTM141<br>cGMP (nM) |
| 0                     | 1                           | 1                   | 1                         | 3                   |
| 0.3                   | 1                           | 3                   | 4                         | 8                   |
| 1                     | 2                           | 8                   | 5                         | 14                  |
| 3                     | 2                           | 8                   | 5                         | 15                  |
| 10                    | 2                           | 7                   | 8                         | 17                  |

Cyclic GMP secretion by primary cultures of human trabecular meshwork (HTM) cells, following treatment with IWP-953. Myofibroblast-like HTM120 and HTM123, and endothelial-like HTM130 and HTM141 cell cultures were treated with increasing concentrations of IWP-953 (0.3  $\mu$ M to 10  $\mu$ M) or vehicle (0.5% DMSO). HTM cell culture supernatants were acetylated and cGMP content was measured using a cGMP enzyme immunoassay. Data are expressed as the mean ( $N = 3$ ). Due to the small amount of secreted cGMP following treatment with IWP-953, no SD is shown.
